# Supplementary material
Source: MDPI journal article supplement (https://www.mdpi.com/2072-4292/14/2/338)
Supplement: s1 [file s1]

**SUPPLEMENTARY FILES**

**Table S1.** Variáveis investigadas na Amazon basin calculadas a partir de produtos orbitais, com destaque para os anos de ocorrência de El Niño. Dados relacionados com a média anual de todos os pixels para toda a bacia para a variável Rainfall (mm year<sup>-1</sup>) e Standardized Precipitation Index (SPI), realizado a soma dos valores a cada 12 meses. As variáveis Gross Primary Productivity (GPP, kg C m<sup>-2</sup> year<sup>-1</sup>) e Fire Foci (counts) foram somadas para a bacia em cada ano estudado; enquanto a variável Emissions (Tg C year<sup>-1</sup>) foram somadas em cada ano para as áreas que ocorreram incêndios dentro da Amazon Basin.

| Year        | SPI             | Rainfall         | GPP             | Fire Foci     | Emissions       |
|-------------|-----------------|------------------|-----------------|---------------|-----------------|
| 2001        | 0.378076        | 2148.7807        | 53322.26        | 64353         | 81.743          |
| 2002        | -0.30498        | 2097.0475        | 55939.27        | 266159        | 160.8072        |
| 2003        | -0.53697        | 2119.1877        | 57069.46        | 309449        | 164.7995        |
| 2004        | 0.151269        | 2142.1887        | 58032.2         | 423351        | 262.2706        |
| <b>2005</b> | <b>-2.04784</b> | <b>2104.0864</b> | <b>58298.57</b> | <b>411618</b> | <b>292.3546</b> |
| 2006        | 1.018487        | 2254.8295        | 57125.41        | 265284        | 139.8303        |
| 2007        | 0.721868        | 2196.6832        | 57503.32        | 357389        | 275.6538        |
| 2008        | 1.276322        | 2250.885         | 55246.54        | 201972        | 110.0371        |
| 2009        | 1.950633        | 2272.4623        | 57067.93        | 134925        | 53.3679         |
| <b>2010</b> | <b>-1.84662</b> | <b>2082.7564</b> | <b>57284.74</b> | <b>342801</b> | <b>332.9607</b> |
| 2011        | 2.12844         | 2272.1908        | 55592.14        | 143214        | 79.4211         |
| 2012        | 2.126909        | 2219.5083        | 56920.19        | 166232        | 129.4267        |
| 2013        | 4.31007         | 2377.7192        | 57347.2         | 106668        | 60.8827         |
| 2014        | 2.232915        | 2301.6217        | 57364.03        | 143193        | 105.6213        |
| <b>2015</b> | <b>-2.84071</b> | <b>1975.7426</b> | <b>59092.35</b> | <b>176128</b> | <b>146.6313</b> |
| 2016        | 0.772055        | 2170.3959        | 76668.14        | 202065        | 163.241         |
| 2017        | 2.578623        | 2347.0219        | 59575.98        | 201669        | 140.5988        |
| 2018        | 1.512612        | 2284.7531        | 60252.15        | 154038        | 98.9184         |
| 2019        | 0.954705        | 1704.0708        | 42335.06        | 205871        | 110.0371        |

**Table S2.** Size of areas, number of polygons and relative percentage of each country with fires within the Amazon Basin.

| Burned Areas in the Amazon Basin |              |       |            |       |              |       |            |       |              |      |            |      |              |      |            |      |              |      |            |      |              |      |            |       |              |      |            |      |              |      |            |      |                |                |
|----------------------------------|--------------|-------|------------|-------|--------------|-------|------------|-------|--------------|------|------------|------|--------------|------|------------|------|--------------|------|------------|------|--------------|------|------------|-------|--------------|------|------------|------|--------------|------|------------|------|----------------|----------------|
| Year                             | BRAZIL       |       |            |       | BOLIVIA      |       |            |       | COLOMBIA     |      |            |      | ECUADOR      |      |            |      | GUYANA       |      |            |      | PERU         |      |            |       | SURINAME     |      |            |      | VENEZUELA    |      |            |      | Total Polygons | Total Area Km² |
|                                  | Nº de Polyg. | %     | Area (km²) | %     | Nº de Polyg. | %     | Area (km²) | %     | Nº de Polyg. | %    | Area (km²) | %    | Nº de Polyg. | %    | Area (km²) | %    | Nº de Polyg. | %    | Area (km²) | %    | Nº de Polyg. | %    | Area (km²) | %     | Nº de Polyg. | %    | Area (km²) | %    | Nº de Polyg. | %    | Area (km²) | %    |                |                |
| 2001                             | 8,635        | 71.3% | 27,528.29  | 62.9% | 3,195        | 26.4% | 15,423.63  | 35.2% | 158          | 1.3% | 598.69     | 1.4% | 1            | 0.0% | 0.25       | 0.0% | 47           | 0.4% | 76.25      | 0.2% | 50           | 0.4% | 58.14      | 0.1%  | 10           | 0.1% | 75.17      | 0.2% | 12           | 0.1% | 7.72       | 0.0% | 12,108         | 43,768.14      |
| 2002                             | 17,869       | 67.2% | 46,092.12  | 55.8% | 8,261        | 31.1% | 35,434.18  | 42.9% | 109          | 0.4% | 214.71     | 0.3% | 1            | 0.0% | 0.25       | 0.0% | 79           | 0.3% | 138.84     | 0.2% | 250          | 0.9% | 289.07     | 0.4%  | 10           | 0.0% | 353.58     | 0.4% | 7            | 0.0% | 12.40      | 0.0% | 26,586         | 82,535.15      |
| 2003                             | 16,680       | 67.7% | 41,550.89  | 60.4% | 6,860        | 27.8% | 25,717.75  | 37.4% | 165          | 0.7% | 353.21     | 0.5% | 4            | 0.0% | 8.69       | 0.0% | 94           | 0.4% | 180.28     | 0.3% | 820          | 3.3% | 880.14     | 1.3%  | 9            | 0.0% | 49.84      | 0.1% | 9            | 0.0% | 18.11      | 0.0% | 24,641         | 68,758.91      |
| 2004                             | 20,471       | 69.8% | 53,682.10  | 47.4% | 8,240        | 28.1% | 54,835.20  | 48.4% | 1            | 0.0% | 3,590.47   | 3.2% | 16           | 0.1% | 8.95       | 0.0% | 181          | 0.6% | 389.38     | 0.3% | 398          | 1.4% | 343.65     | 0.3%  | 20           | 0.1% | 315.09     | 0.3% | 9            | 0.0% | 17.87      | 0.0% | 29,336         | 113,182.70     |
| 2005                             | 18,060       | 67.7% | 56,130.00  | 51.3% | 6,637        | 24.9% | 49,884.30  | 45.6% | 206          | 0.8% | 373.81     | 0.3% | 20           | 0.1% | 32.99      | 0.0% | 72           | 0.3% | 210.84     | 0.2% | 1,653        | 6.2% | 2,678.55   | 2.4%  | 6            | 0.0% | 23.67      | 0.0% | 5            | 0.0% | 6.94       | 0.0% | 26,659         | 109,341.10     |
| 2006                             | 12,823       | 64.8% | 35,471.20  | 47.7% | 5,695        | 28.8% | 37,191.20  | 50.0% | 538          | 2.7% | 597.01     | 0.8% | 13           | 0.1% | 9.42       | 0.0% | 79           | 0.4% | 220.31     | 0.3% | 590          | 3.0% | 696.03     | 0.9%  | 30           | 0.2% | 208.00     | 0.3% | 12           | 0.1% | 5.94       | 0.0% | 19,780         | 74,399.11      |
| 2007                             | 16,957       | 65.8% | 67,752.54  | 62.9% | 6,968        | 27.0% | 35,921.17  | 33.3% | 878          | 3.4% | 2,731.50   | 2.5% | 8            | 0.0% | 3.17       | 0.0% | 93           | 0.4% | 229.02     | 0.2% | 851          | 3.3% | 1,083.18   | 1.0%  | 8            | 0.0% | 13.66      | 0.0% | 19           | 0.1% | 48.12      | 0.0% | 25,782         | 107,782.36     |
| 2008                             | 9,395        | 58.7% | 31,536.67  | 53.0% | 5,639        | 35.2% | 26,148.27  | 43.9% | 428          | 2.7% | 1,051.02   | 1.8% | 2            | 0.0% | 0.50       | 0.0% | 58           | 0.4% | 147.33     | 0.2% | 476          | 3.0% | 591.02     | 1.0%  | 10           | 0.1% | 48.35      | 0.1% | 2            | 0.0% | 1.23       | 0.0% | 16,010         | 59,524.39      |
| 2009                             | 7,902        | 57.5% | 75,152.00  | 68.7% | 4,817        | 35.0% | 29,111.00  | 26.6% | 416          | 3.0% | 523.00     | 0.5% | 11           | 0.1% | 8.00       | 0.0% | 128          | 0.9% | 227.00     | 0.2% | 437          | 3.2% | 392.00     | 0.4%  | 32           | 0.2% | 4,004.00   | 3.7% | 4            | 0.0% | 5.00       | 0.0% | 13,747         | 109,422.00     |
| 2010                             | 13,066       | 52.8% | 71,614.37  | 47.2% | 10,086       | 40.7% | 77,413.05  | 51.0% | 157          | 0.6% | 528.35     | 0.3% | 17           | 0.1% | 12.91      | 0.0% | 38           | 0.2% | 115.80     | 0.1% | 1,395        | 5.6% | 1,991.08   | 1.3%  | 2            | 0.0% | 2.87       | 0.0% | 6            | 0.0% | 8.93       | 0.0% | 24,767         | 151,687.36     |
| 2011                             | 5,275        | 51.0% | 21,308.37  | 39.3% | 4,172        | 40.3% | 31,195.40  | 57.5% | 492          | 4.8% | 1,034.15   | 1.9% | 2            | 0.0% | 0.74       | 0.0% | 94           | 0.9% | 227.40     | 0.4% | 297          | 2.9% | 336.85     | 0.6%  | 9            | 0.1% | 135.30     | 0.2% | 10           | 0.1% | 7.67       | 0.0% | 10,351         | 54,245.88      |
| 2012                             | 7,840        | 62.2% | 31,189.07  | 57.7% | 3,322        | 26.4% | 20,751.73  | 38.4% | 307          | 2.4% | 441.61     | 0.8% | 5            | 0.0% | 16.39      | 0.0% | 119          | 0.9% | 230.65     | 0.4% | 985          | 7.8% | 1,106.85   | 2.0%  | 10           | 0.1% | 321.39     | 0.6% | 10           | 0.1% | 12.62      | 0.0% | 12,598         | 54,070.31      |
| 2013                             | 6,295        | 59.6% | 17,386.12  | 50.5% | 3,152        | 29.9% | 15,690.11  | 45.6% | 418          | 4.0% | 487.79     | 1.4% | 3            | 0.0% | 1.09       | 0.0% | 130          | 1.2% | 327.89     | 1.0% | 535          | 5.1% | 485.41     | 1.4%  | 15           | 0.1% | 35.10      | 0.1% | 10           | 0.1% | 15.04      | 0.0% | 10,558         | 34,428.56      |
| 2014                             | 8,455        | 63.3% | 28,728.83  | 69.0% | 3,784        | 28.3% | 10,679.93  | 25.6% | 518          | 3.9% | 1,050.75   | 2.5% | 3            | 0.0% | 2.48       | 0.0% | 120          | 0.9% | 371.53     | 0.9% | 468          | 3.5% | 502.94     | 1.2%  | 11           | 0.1% | 298.95     | 0.7% | 5            | 0.0% | 4.45       | 0.0% | 13,364         | 41,639.86      |
| 2015                             | 13,042       | 69.8% | 36,323.59  | 63.2% | 4,556        | 24.4% | 19,523.46  | 34.0% | 251          | 1.3% | 271.07     | 0.5% | 8            | 0.0% | 9.68       | 0.0% | 180          | 1.0% | 485.29     | 0.8% | 604          | 3.2% | 653.65     | 1.1%  | 17           | 0.1% | 206.75     | 0.4% | 17           | 0.1% | 23.14      | 0.0% | 18,675         | 57,496.63      |
| 2016                             | 10,206       | 58.0% | 34,799.45  | 37.1% | 5,725        | 32.5% | 32,942.52  | 35.2% | 617          | 3.5% | 747.72     | 0.8% | 14           | 0.1% | 8.67       | 0.0% | 73           | 0.4% | 230.92     | 0.2% | 939          | 5.3% | 24,882.00  | 26.6% | 13           | 0.1% | 55.50      | 0.1% | 6            | 0.0% | 19.60      | 0.0% | 17,593         | 93,686.38      |
| 2017                             | 11,356       | 67.3% | 44,912.42  | 64.6% | 4,468        | 26.5% | 22,963.61  | 33.0% | 555          | 3.3% | 639.96     | 0.9% | 3            | 0.0% | 1.99       | 0.0% | 156          | 0.9% | 433.03     | 0.6% | 307          | 1.8% | 355.35     | 0.5%  | 17           | 0.1% | 212.57     | 0.3% | 5            | 0.0% | 3.71       | 0.0% | 16,867         | 69,522.64      |
| 2018                             | 8,713        | 58.2% | 21,881.83  | 50.6% | 4,500        | 30.0% | 17,069.40  | 39.4% | 1,055        | 7.0% | 3,564.69   | 8.2% | 2            | 0.0% | 0.50       | 0.0% | 90           | 0.6% | 240.08     | 0.6% | 595          | 4.0% | 474.61     | 1.1%  | 15           | 0.1% | 47.90      | 0.1% | 9            | 0.1% | 8.34       | 0.0% | 14,979         | 43,287.35      |
| 2019                             | 7,047        | 69.5% | 30,319.87  | 67.9% | 2,422        | 23.9% | 13,354.36  | 29.9% | 69           | 0.7% | 85.39      | 0.2% | 0            | 0.0% | 0.00       | 0.0% | 72           | 0.7% | 182.06     | 0.4% | 516          | 5.1% | 656.66     | 1.5%  | 1            | 0.0% | 0.99       | 0.0% | 13           | 0.1% | 23.91      | 0.1% | 10,140         | 44,623.24      |
|                                  |              |       |            |       |              |       |            |       |              |      |            |      |              |      |            |      |              |      |            |      |              |      |            |       |              |      |            |      |              |      |            |      |                |                |
| TOTAL                            | 220,087      | 63.9% | 773,360    | 54.7% | 102,499      | 29.7% | 571,250    | 40.4% | 7,338        | 2.1% | 18,885     | 1.3% | 133          | 0.0% | 127        | 0.0% | 1,903        | 0.6% | 4,664      | 0.3% | 12,166       | 3.5% | 38,457     | 2.7%  | 245          | 0.1% | 6,409      | 0.5% | 170          | 0.0% | 251        | 0.0% | 344,541        | 1,413,402      |

**Table S3.** Size of areas, number of polygons and relative percentage with fires within indigenous lands (IL's) that are in the countries inserted in Amazon Basin.

| Burned Areas in the Indigenous Lands |              |        |            |        |              |        |            |        |              |       |            |       |              |       |            |       |              |       |            |       |              |       |            |       |              |       |            |       |              |       |            |       |                |                |
|--------------------------------------|--------------|--------|------------|--------|--------------|--------|------------|--------|--------------|-------|------------|-------|--------------|-------|------------|-------|--------------|-------|------------|-------|--------------|-------|------------|-------|--------------|-------|------------|-------|--------------|-------|------------|-------|----------------|----------------|
| Year                                 | BRAZIL       |        |            |        | BOLIVIA      |        |            |        | COLOMBIA     |       |            |       | ECUADOR      |       |            |       | GUYANA       |       |            |       | PERU         |       |            |       | SURINAME     |       |            |       | VENEZUELA    |       |            |       | Total Polygons | Total Area Km² |
|                                      | Nº de Polyg. | %      | Area (km²) | %      | Nº de Polyg. | %      | Area (km²) | %      | Nº de Polyg. | %     | Area (km²) | %     | Nº de Polyg. | %     | Area (km²) | %     | Nº de Polyg. | %     | Area (km²) | %     | Nº de Polyg. | %     | Area (km²) | %     | Nº de Polyg. | %     | Area (km²) | %     | Nº de Polyg. | %     | Area (km²) | %     |                |                |
| 2001                                 | 763          | 48.6 % | 7,568.29   | 66.1 % | 758          | 48.3 % | 3,776.99   | 33.0 % | 5            | 0.3 % | 10.42      | 0.1 % | 1            | 0.1 % | 0.25       | 0.0 % | 8            | 0.5 % | 12.98      | 0.1 % | 14           | 0.9 % | 13.39      | 0.1 % | 10           | 0.6 % | 62.14      | 0.5 % | 10           | 0.6 % | 6.31       | 0.1 % | 1,569          | 11,450.77      |
| 2002                                 | 1077         | 36.9 % | 9,234.13   | 55.5 % | 1790         | 61.4 % | 7,032.47   | 42.3 % | 8            | 0.3 % | 12.41      | 0.1 % | 0            | 0.0 % | 0.00       | 0.0 % | 13           | 0.4 % | 20.44      | 0.1 % | 14           | 0.5 % | 8.97       | 0.1 % | 9            | 0.3 % | 312.00     | 1.9 % | 4            | 0.1 % | 3.47       | 0.0 % | 2,915          | 16,623.89      |
| 2003                                 | 978          | 38.0 % | 8,215.34   | 57.5 % | 1447         | 56.3 % | 5,904.24   | 41.3 % | 9            | 0.3 % | 3.22       | 0.0 % | 0            | 0.0 % | 0.00       | 0.0 % | 34           | 1.3 % | 28.41      | 0.2 % | 89           | 3.5 % | 81.72      | 0.6 % | 7            | 0.3 % | 48.85      | 0.3 % | 8            | 0.3 % | 17.12      | 0.1 % | 2,572          | 14,298.90      |
| 2004                                 | 1418         | 37.5 % | 11,915.50  | 46.4 % | 2058         | 54.5 % | 13,074.89  | 50.9 % | 172          | 4.6 % | 318.38     | 1.2 % | 8            | 0.2 % | 3.03       | 0.0 % | 42           | 1.1 % | 40.92      | 0.2 % | 53           | 1.4 % | 38.20      | 0.1 % | 18           | 0.5 % | 253.84     | 1.0 % | 9            | 0.2 % | 17.87      | 0.1 % | 3,778          | 25,662.63      |
| 2005                                 | 1298         | 40.2 % | 10,710.70  | 48.9 % | 1631         | 50.6 % | 10,768.50  | 49.1 % | 13           | 0.4 % | 8.31       | 0.0 % | 6            | 0.2 % | 9.77       | 0.0 % | 12           | 0.4 % | 18.12      | 0.1 % | 256          | 7.9 % | 373.50     | 1.7 % | 5            | 0.2 % | 22.47      | 0.1 % | 5            | 0.2 % | 6.59       | 0.0 % | 3,226          | 21,917.96      |
| 2006                                 | 1150         | 46.7 % | 8,501.93   | 51.0 % | 1183         | 48.1 % | 7,878.98   | 47.3 % | 19           | 0.8 % | 38.40      | 0.2 % | 2            | 0.1 % | 0.50       | 0.0 % | 10           | 0.4 % | 11.92      | 0.1 % | 64           | 2.6 % | 68.98      | 0.4 % | 25           | 1.0 % | 156.03     | 0.9 % | 9            | 0.4 % | 5.01       | 0.0 % | 2,462          | 16,661.75      |
| 2007                                 | 1553         | 43.3 % | 12,379.45  | 62.5 % | 1810         | 50.5 % | 7,147.24   | 36.1 % | 67           | 1.9 % | 99.10      | 0.5 % | 6            | 0.2 % | 1.93       | 0.0 % | 21           | 0.6 % | 22.94      | 0.1 % | 101          | 2.8 % | 94.79      | 0.5 % | 8            | 0.2 % | 10.46      | 0.1 % | 21           | 0.6 % | 47.30      | 0.2 % | 3,587          | 19,803.21      |
| 2008                                 | 804          | 34.7 % | 8,688.40   | 56.2 % | 1384         | 59.7 % | 6,372.61   | 41.2 % | 27           | 1.2 % | 59.11      | 0.4 % | 73           | 3.1 % | 230.92     | 1.5 % | 13           | 0.6 % | 55.50      | 0.4 % | 6            | 0.3 % | 19.60      | 0.1 % | 10           | 0.4 % | 38.61      | 0.2 % | 2            | 0.1 % | 0.42       | 0.0 % | 2,319          | 15,465.17      |
| 2009                                 | 910          | 43.6 % | 5,748.90   | 55.1 % | 1058         | 50.7 % | 4,181.70   | 40.1 % | 14           | 0.7 % | 34.08      | 0.3 % | 1            | 0.0 % | 1.36       | 0.0 % | 15           | 0.7 % | 11.66      | 0.1 % | 54           | 2.6 % | 33.55      | 0.3 % | 31           | 1.5 % | 211.96     | 2.0 % | 3            | 0.1 % | 211.96     | 2.0 % | 2,086          | 10,435.17      |
| 2010                                 | 1585         | 32.4 % | 14,964.75  | 44.3 % | 3061         | 62.5 % | 18,461.26  | 54.7 % | 20           | 0.4 % | 36.64      | 0.1 % | 8            | 0.2 % | 7.46       | 0.0 % | 3            | 0.1 % | 5.46       | 0.0 % | 210          | 4.3 % | 261.85     | 0.8 % | 2            | 0.0 % | 2.87       | 0.0 % | 6            | 0.1 % | 8.93       | 0.0 % | 4,895          | 33,749.23      |
| 2011                                 | 895          | 44.1 % | 8,001.02   | 46.1 % | 1051         | 51.8 % | 9,144.71   | 52.6 % | 22           | 1.1 % | 53.61      | 0.3 % | 2            | 0.1 % | 0.36       | 0.0 % | 15           | 0.7 % | 14.34      | 0.1 % | 28           | 1.4 % | 39.86      | 0.2 % | 8            | 0.4 % | 112.68     | 0.6 % | 9            | 0.4 % | 7.42       | 0.0 % | 2,030          | 17,374.00      |
| 2012                                 | 994          | 48.6 % | 10,018.77  | 64.1 % | 883          | 43.2 % | 5,396.72   | 34.5 % | 23           | 1.1 % | 22.49      | 0.1 % | 1            | 0.0 % | 0.50       | 0.0 % | 15           | 0.7 % | 18.60      | 0.1 % | 112          | 5.5 % | 83.03      | 0.5 % | 10           | 0.5 % | 83.03      | 0.5 % | 8            | 0.4 % | 11.18      | 0.1 % | 2,046          | 15,634.32      |
| 2013                                 | 776          | 44.5 % | 6,013.49   | 56.3 % | 835          | 47.9 % | 4,499.13   | 42.1 % | 24           | 1.4 % | 45.63      | 0.4 % | 0            | 0.0 % | 0.00       | 0.0 % | 14           | 0.8 % | 6.10       | 0.1 % | 71           | 4.1 % | 71.04      | 0.7 % | 15           | 0.9 % | 34.68      | 0.3 % | 9            | 0.5 % | 13.83      | 0.1 % | 1,744          | 10,683.90      |
| 2014                                 | 1044         | 48.7 % | 9,485.64   | 74.6 % | 974          | 45.4 % | 2,864.24   | 22.5 % | 39           | 1.8 % | 50.98      | 0.4 % | 0            | 0.0 % | 0.00       | 0.0 % | 14           | 0.7 % | 12.40      | 0.1 % | 59           | 2.8 % | 56.69      | 0.4 % | 11           | 0.5 % | 243.08     | 1.9 % | 4            | 0.2 % | 4.21       | 0.0 % | 2,145          | 12,717.25      |
| 2015                                 | 1070         | 44.5 % | 7,993.15   | 60.5 % | 1167         | 48.6 % | 4,873.55   | 36.9 % | 16           | 0.7 % | 15.43      | 0.1 % | 0            | 0.0 % | 0.00       | 0.0 % | 32           | 1.3 % | 38.98      | 0.3 % | 85           | 3.5 % | 84.07      | 0.6 % | 15           | 0.6 % | 179.08     | 1.4 % | 17           | 0.7 % | 22.31      | 0.2 % | 2,402          | 13,206.57      |
| 2016                                 | 1109         | 39.7 % | 8,719.74   | 51.5 % | 1432         | 51.3 % | 7,821.98   | 46.2 % | 56           | 2.0 % | 46.26      | 0.3 % | 4            | 0.1 % | 1.38       | 0.0 % | 17           | 0.6 % | 59.28      | 0.4 % | 155          | 5.6 % | 209.55     | 1.2 % | 13           | 0.5 % | 55.50      | 0.3 % | 6            | 0.2 % | 19.35      | 0.1 % | 2,792          | 16,933.04      |
| 2017                                 | 1369         | 50.6 % | 10,912.39  | 60.8 % | 1211         | 44.8 % | 6,770.85   | 37.7 % | 33           | 1.2 % | 26.29      | 0.1 % | 1            | 0.0 % | 0.00       | 0.0 % | 26           | 1.0 % | 32.61      | 0.2 % | 43           | 1.6 % | 38.89      | 0.2 % | 16           | 0.6 % | 160.86     | 0.9 % | 5            | 0.2 % | 3.71       | 0.0 % | 2,704          | 17,945.62      |
| 2018                                 | 875          | 37.2 % | 5,590.42   | 54.3 % | 1248         | 53.1 % | 4,382.61   | 42.6 % | 66           | 2.8 % | 155.53     | 1.5 % | 0            | 0.0 % | 0.00       | 0.0 % | 20           | 0.9 % | 20.87      | 0.2 % | 119          | 5.1 % | 85.77      | 0.8 % | 15           | 0.6 % | 46.00      | 0.4 % | 9            | 0.4 % | 8.21       | 0.1 % | 2,352          | 10,289.41      |
| 2019                                 | 940          | 56.0 % | 6,432.38   | 67.6 % | 579          | 34.5 % | 2,904.98   | 30.5 % | 6            | 0.4 % | 3.18       | 0.0 % | 0            | 0.0 % | 0.00       | 0.0 % | 22           | 1.3 % | 33.63      | 0.4 % | 118          | 7.0 % | 112.26     | 1.2 % | 1            | 0.1 % | 0.99       | 0.0 % | 12           | 0.7 % | 23.66      | 0.2 % | 1,678          | 9,511.08       |
|                                      |              |        |            |        |              |        |            |        |              |       |            |       |              |       |            |       |              |       |            |       |              |       |            |       |              |       |            |       |              |       |            |       |                |                |
| TOTAL                                | 20,608       | 41.8 % | 171,094    | 55.1 % | 25,560       | 51.8 % | 133,258    | 42.9 % | 639          | 1.3 % | 1,039      | 0.3 % | 113          | 0.2 % | 257        | 0.1 % | 346          | 0.7 % | 465        | 0.1 % | 1,651        | 3.3 % | 1,776      | 0.6 % | 229          | 0.5 % | 2,035      | 0.7 % | 156          | 0.3 % | 439        | 0.1 % | 49,302         | 310,363.86     |

**Table S4.** Size of areas, number of polygons and relative percentage with fires within conservation units (CU's) that are in the countries inserted in Amazon Basin.

| Burned Areas in the Conservation Units |              |        |            |        |              |        |            |        |              |        |            |        |              |       |            |       |              |       |            |       |              |       |            |       |              |       |            |        |              |       |            |       |                |                |
|----------------------------------------|--------------|--------|------------|--------|--------------|--------|------------|--------|--------------|--------|------------|--------|--------------|-------|------------|-------|--------------|-------|------------|-------|--------------|-------|------------|-------|--------------|-------|------------|--------|--------------|-------|------------|-------|----------------|----------------|
| Year                                   | BRAZIL       |        |            |        | BOLIVIA      |        |            |        | COLOMBIA     |        |            |        | ECUADOR      |       |            |       | GUYANA       |       |            |       | PERU         |       |            |       | SURINAME     |       |            |        | VENEZUELA    |       |            |       | Total Polygons | Total Area Km² |
|                                        | Nº de Polyg. | %      | Area (km²) | %      | Nº de Polyg. | %      | Area (km²) | %      | Nº de Polyg. | %      | Area (km²) | %      | Nº de Polyg. | %     | Area (km²) | %     | Nº de Polyg. | %     | Area (km²) | %     | Nº de Polyg. | %     | Area (km²) | %     | Nº de Polyg. | %     | Area (km²) | %      | Nº de Polyg. | %     | Area (km²) | %     |                |                |
| 2001                                   | 279          | 55.4 % | 497.33     | 25.1 % | 116          | 23.0 % | 1,036.53   | 52.3 % | 91           | 18.1 % | 377.61     | 19.1 % | 0            | 0.0 % | 0.00       | 0.0 % | 0            | 0.0 % | 0.00       | 0.0 % | 2            | 0.4 % | 0.49       | 0.0 % | 9            | 1.8 % | 65.13      | 3.3 %  | 7            | 1.4 % | 3.19       | 0.2 % | 504            | 1,980.28       |
| 2002                                   | 400          | 61.0 % | 819.88     | 35.9 % | 183          | 27.9 % | 1,020.58   | 44.7 % | 56           | 8.5 %  | 117.26     | 5.1 %  | 0            | 0.0 % | 0.00       | 0.0 % | 0            | 0.0 % | 0.00       | 0.0 % | 4            | 0.6 % | 0.97       | 0.0 % | 9            | 1.4 % | 315.03     | 13.8 % | 4            | 0.6 % | 9.19       | 0.4 % | 656            | 2,282.91       |
| 2003                                   | 438          | 56.7 % | 1,605.36   | 50.4 % | 230          | 29.8 % | 1,251.85   | 39.3 % | 62           | 8.0 %  | 246.46     | 7.7 %  | 0            | 0.0 % | 0.00       | 0.0 % | 0            | 0.0 % | 0.00       | 0.0 % | 28           | 3.6 % | 20.24      | 0.6 % | 6            | 0.8 % | 46.30      | 1.5 %  | 9            | 1.2 % | 18.11      | 0.6 % | 773            | 3,188.32       |
| 2004                                   | 664          | 61.7 % | 1,971.16   | 38.7 % | 221          | 20.5 % | 1,511.77   | 29.7 % | 160          | 14.9 % | 1,316.96   | 25.9 % | 2            | 0.2 % | 0.50       | 0.0 % | 0            | 0.0 % | 0.00       | 0.0 % | 8            | 0.7 % | 10.46      | 0.2 % | 18           | 1.7 % | 269.38     | 5.3 %  | 3            | 0.3 % | 9.50       | 0.2 % | 1,076          | 5,089.73       |
| 2005                                   | 656          | 60.7 % | 1,954.19   | 56.1 % | 242          | 22.4 % | 1,209.64   | 34.8 % | 96           | 8.9 %  | 279.57     | 8.0 %  | 3            | 0.3 % | 6.45       | 0.2 % | 0            | 0.0 % | 0.00       | 0.0 % | 78           | 7.2 % | 6.45       | 0.2 % | 4            | 0.4 % | 23.03      | 0.7 %  | 2            | 0.2 % | 0.99       | 0.0 % | 1,081          | 3,480.32       |
| 2006                                   | 503          | 58.1 % | 1,524.81   | 57.9 % | 194          | 22.4 % | 698.60     | 26.5 % | 112          | 12.9 % | 199.86     | 7.6 %  | 4            | 0.5 % | 0.99       | 0.0 % | 0            | 0.0 % | 0.00       | 0.0 % | 20           | 2.3 % | 30.06      | 1.1 % | 26           | 3.0 % | 178.03     | 6.8 %  | 7            | 0.8 % | 2.22       | 0.1 % | 866            | 2,634.57       |
| 2007                                   | 507          | 52.3 % | 1,263.84   | 34.7 % | 267          | 27.5 % | 1,190.98   | 32.7 % | 152          | 15.7 % | 1,112.38   | 30.5 % | 1            | 0.1 % | 0.25       | 0.0 % | 0            | 0.0 % | 0.00       | 0.0 % | 21           | 2.2 % | 20.27      | 0.6 % | 7            | 0.7 % | 12.15      | 0.3 %  | 15           | 1.5 % | 42.33      | 1.2 % | 970            | 3,642.20       |
| 2008                                   | 282          | 47.0 % | 864.54     | 39.0 % | 190          | 31.7 % | 897.46     | 40.5 % | 105          | 17.5 % | 412.82     | 18.6 % | 0            | 0.0 % | 0.00       | 0.0 % | 0            | 0.0 % | 0.00       | 0.0 % | 13           | 2.2 % | 10.59      | 0.5 % | 10           | 1.7 % | 30.51      | 1.4 %  | 0            | 0.0 % | 0          | 0.0 % | 600            | 2,215.92       |
| 2009                                   | 260          | 49.5 % | 545.03     | 12.4 % | 99           | 18.9 % | 578.14     | 13.1 % | 142          | 27.0 % | 1,636.92   | 37.2 % | 3            | 0.6 % | 0.76       | 0.0 % | 0            | 0.0 % | 0.00       | 0.0 % | 2            | 0.4 % | 0.48       | 0.0 % | 19           | 3.6 % | 1,636.92   | 37.2 % | 0            | 0.0 % | 0.00       | 0.0 % | 525            | 4,398.25       |
| 2010                                   | 575          | 53.8 % | 2,690.78   | 44.1 % | 399          | 37.3 % | 2,979.76   | 48.8 % | 48           | 4.5 %  | 372.77     | 6.1 %  | 1            | 0.1 % | 0.50       | 0.0 % | 0            | 0.0 % | 0.00       | 0.0 % | 40           | 3.7 % | 51.82      | 0.8 % | 2            | 0.2 % | 1.37       | 0.0 %  | 4            | 0.4 % | 8.19       | 0.1 % | 1,069          | 6,105.18       |
| 2011                                   | 236          | 45.3 % | 1,324.75   | 52.5 % | 154          | 29.6 % | 852.40     | 33.8 % | 113          | 21.7 % | 220.34     | 8.7 %  | 0            | 0.0 % | 0.00       | 0.0 % | 0            | 0.0 % | 0.00       | 0.0 % | 7            | 1.3 % | 2.74       | 0.1 % | 8            | 1.5 % | 122.67     | 4.9 %  | 3            | 0.6 % | 0.53       | 0.0 % | 521            | 2,523.41       |
| 2012                                   | 303          | 55.8 % | 920.91     | 32.2 % | 130          | 23.9 % | 1,401.49   | 49.0 % | 67           | 12.3 % | 219.71     | 7.7 %  | 2            | 0.4 % | 0.92       | 0.0 % | 0            | 0.0 % | 0.00       | 0.0 % | 25           | 4.6 % | 19.61      | 0.7 % | 9            | 1.7 % | 289.96     | 10.1 % | 7            | 1.3 % | 5.07       | 0.2 % | 543            | 2,857.67       |
| 2013                                   | 149          | 45.2 % | 384.55     | 27.7 % | 82           | 24.8 % | 781.42     | 56.3 % | 66           | 20.0 % | 187.75     | 13.5 % | 0            | 0.0 % | 0.00       | 0.0 % | 0            | 0.0 % | 0.00       | 0.0 % | 17           | 5.2 % | 7.05       | 0.5 % | 12           | 3.6 % | 24.77      | 1.8 %  | 4            | 1.2 % | 3.23       | 0.2 % | 330            | 1,388.77       |
| 2014                                   | 309          | 59.9 % | 1,409.26   | 55.6 % | 58           | 11.2 % | 433.81     | 17.1 % | 127          | 24.6 % | 409.76     | 16.2 % | 1            | 0.2 % | 1.24       | 0.0 % | 0            | 0.0 % | 0.00       | 0.0 % | 10           | 1.9 % | 8.02       | 0.3 % | 9            | 1.7 % | 270.01     | 10.7 % | 2            | 0.4 % | 0.48       | 0.0 % | 516            | 2,532.58       |
| 2015                                   | 516          | 66.4 % | 1,268.99   | 44.8 % | 162          | 20.8 % | 1,286.85   | 45.4 % | 54           | 6.9 %  | 87.27      | 3.1 %  | 2            | 0.3 % | 0.09       | 0.0 % | 0            | 0.0 % | 0.00       | 0.0 % | 20           | 2.6 % | 0.09       | 0.0 % | 15           | 1.9 % | 173.92     | 6.1 %  | 8            | 1.0 % | 16.18      | 0.6 % | 777            | 2,833.39       |
| 2016                                   | 426          | 56.3 % | 1,600.49   | 45.8 % | 188          | 24.9 % | 1,492.78   | 42.7 % | 98           | 13.0 % | 282.52     | 8.1 %  | 2            | 0.3 % | 0.85       | 0.0 % | 0            | 0.0 % | 0.00       | 0.0 % | 27           | 3.6 % | 51.03      | 1.5 % | 11           | 1.5 % | 52.61      | 1.5 %  | 4            | 0.5 % | 14.13      | 0.4 % | 756            | 3,494.41       |
| 2017                                   | 591          | 65.8 % | 1,244.21   | 51.9 % | 165          | 18.4 % | 755.04     | 31.5 % | 115          | 12.8 % | 185.05     | 7.7 %  | 0            | 0.0 % | 0.00       | 0.0 % | 0            | 0.0 % | 0.00       | 0.0 % | 8            | 0.9 % | 4.63       | 0.2 % | 16           | 1.8 % | 204.34     | 8.5 %  | 3            | 0.3 % | 1.88       | 0.1 % | 898            | 2,395.15       |
| 2018                                   | 394          | 55.1 % | 798.79     | 32.0 % | 126          | 17.6 % | 833.94     | 33.4 % | 167          | 23.4 % | 798.79     | 32.0 % | 0            | 0.0 % | 0.00       | 0.0 % | 0            | 0.0 % | 0.00       | 0.0 % | 13           | 1.8 % | 18.88      | 0.8 % | 15           | 2.1 % | 47.90      | 1.9 %  | 0            | 0.0 % | 0.00       | 0.0 % | 715            | 2,498.30       |
| 2019                                   | 308          | 72.3 % | 1,244.34   | 87.6 % | 49           | 11.5 % | 88.16      | 6.2 %  | 38           | 8.9 %  | 56.80      | 4.0 %  | 0            | 0.0 % | 0.00       | 0.0 % | 0            | 0.0 % | 0.00       | 0.0 % | 22           | 5.2 % | 9.66       | 0.7 % | 0            | 0.0 % | 0.00       | 0.0 %  | 9            | 2.1 % | 22.33      | 1.6 % | 426            | 1,421.29       |
|                                        |              |        |            |        |              |        |            |        |              |        |            |        |              |       |            |       |              |       |            |       |              |       |            |       |              |       |            |        |              |       |            |       |                |                |
| TOTAL                                  | 7,796        | 57.3 % | 23,933     | 42.0 % | 3,255        | 23.9 % | 20,301     | 35.6 % | 1,869        | 13.7 % | 8,521      | 15.0 % | 21           | 0.2 % | 13         | 0.0 % | 0            | 0.0 % | 0          | 0.0 % | 365          | 2.7 % | 274        | 0.5 % | 205          | 1.5 % | 3,764      | 6.6 %  | 91           | 0.7 % | 158        | 0.3 % | 13,602         | 56,962.65      |

**Table S5.** Multiple regression models for the emissions as a function of the fire foci, rainfall, SPI and gross primary production (GPP).

| <b>Coefficients</b>     | <b>Estimate</b> | <b>Std. Error</b>    | <b>p-value</b> |
|-------------------------|-----------------|----------------------|----------------|
| <b>Intercept</b>        | 6.815e+01       | 1.486e+02            | 0.653          |
| <b>Fire foci</b>        | 6.147e-04       | 9.890e-05            | <0.001         |
| <b>Rainfall</b>         | -4.888e-02      | 8.484e-02            | 0.574          |
| <b>SPI</b>              | -6.849          | 7.574                | 0.381          |
| <b>GPP</b>              | 1.050e-03       | 1.713e-03            | 0.550          |
| Multiple $R^2 = 0.8473$ |                 | F-statistic = 19.42* |                |

\*: significant by F-test.

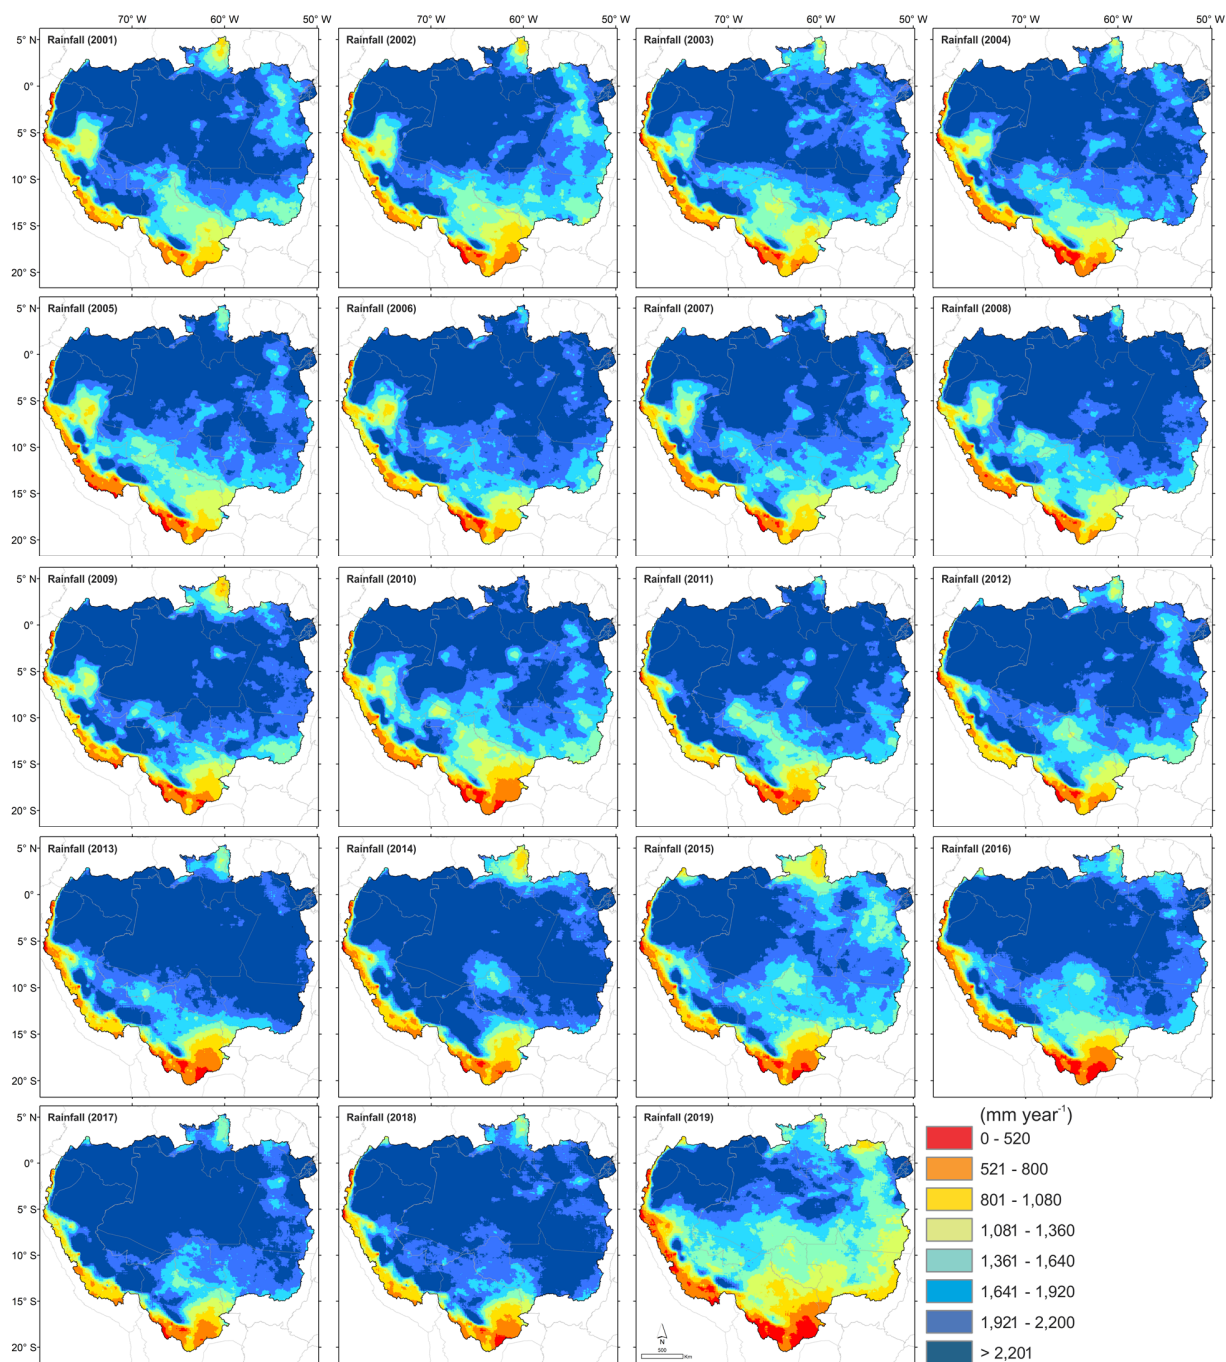

**Figure S1.** Measurement of annual Rainfall (mm year<sup>-1</sup>) of the study area between the years 2001-2019.

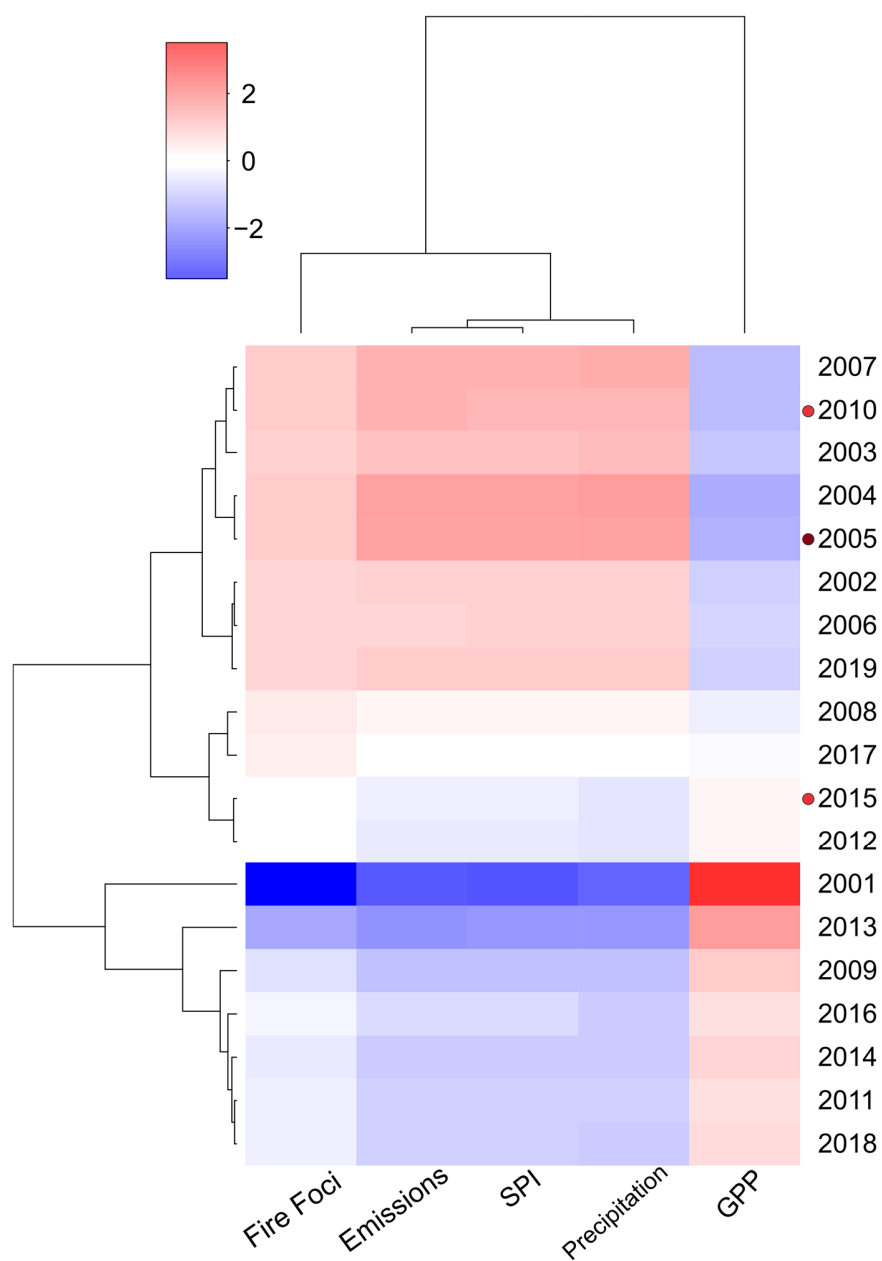

**Figure S2.** Pearson-cluster Correlation (red dots indicate that there were El Niño in the year (2010 and 2015) and dark red dots indicate that there were sea surface temperature (SST) anomalies in the North tropical Atlantic (2005)).

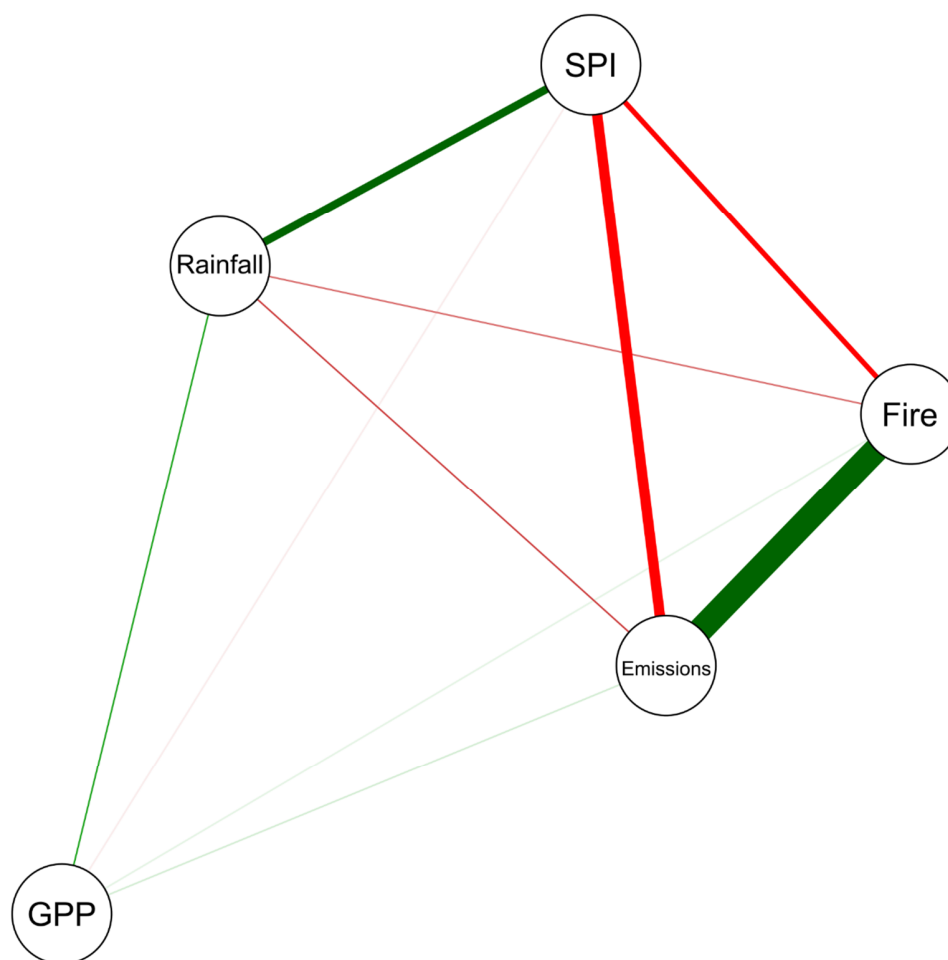

**Figure S3.** Network Pearson correlation between the variables. Positive correlations were linked by green dashes, while negative correlations were linked by red dashes. The thickness of the trace is proportional to the magnitude of the correlation.



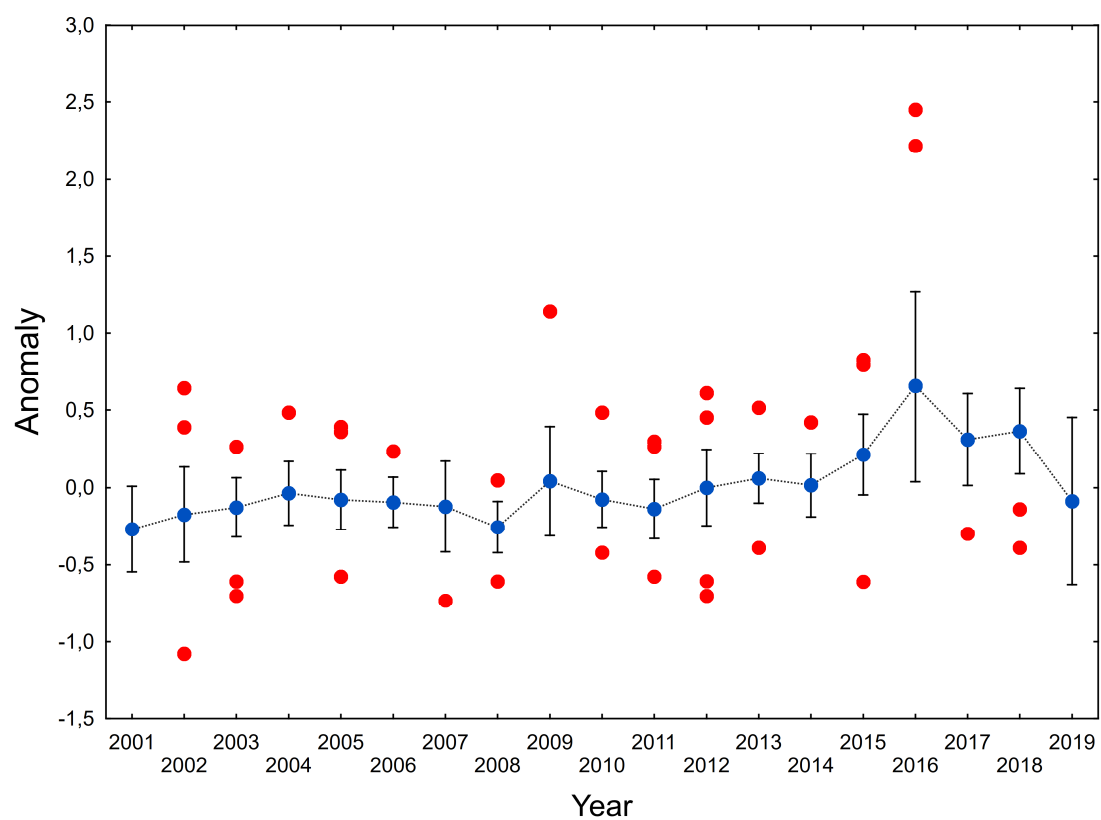

**Figure S4.** Time series (2001 to 2019) of the anomaly variation between SPI (Standardized Precipitation Index) calculated from long-time rainfall and the sum of GPP (Gross Primary Production) values for the Amazon basin, indicating its standard deviation and outliers (red dots).
